# Supplementary material for: Long-Term Effects of Rifaximin on Patients with Hepatic Encephalopathy: Its Possible Effects on the Improvement in the Blood Ammonia Concentration Levels, Hepatic Spare Ability and Refractory Ascites
Source: MDPI journal article supplement (doi:10.3390/medicina58091276), 2022-09-14
Supplement: s1 [file s1]

**Supplementary Table S1.** Clinical characteristics of the 27 improved hepatic ascites cases.

| No | Age | Sex | Etiology                           | Added drug or therapy for hepatic ascites after the administration of RFX |
|----|-----|-----|------------------------------------|---------------------------------------------------------------------------|
| 1  | 69  | M   | NASH                               | Tolvaptan, Propranolol                                                    |
| 2  | 81  | F   | NASH                               | Tolvaptan, BCAA, Carnitine                                                |
| 3  | 74  | F   | HCV                                | Tolvaptan, BCAA                                                           |
| 4  | 67  | M   | HBV                                | Tolvaptan, BCAA                                                           |
| 5  | 74  | M   | NASH                               | Tolvaptan                                                                 |
| 6  | 43  | M   | Alcoholic                          | Tolvaptan, BCAA, Carnitine, Zinc                                          |
| 7  | 61  | F   | AIH+PBC                            | Tolvaptan, Spironolactone, BCAA, Carnitine, Synthetic disaccharides       |
| 8  | 66  | M   | Alcoholic                          | Tolvaptan, Furosemide, BCAA, Carnitine                                    |
| 9  | 55  | M   | Alcoholic                          | Tolvaptan, Synthetic disaccharides, Carnitine                             |
| 10 | 50  | M   | Alcoholic                          | Furosemide, BCAA                                                          |
| 11 | 61  | F   | Alcoholic                          | Furosemide, Spironolactone, BCAA, Carnitine, Zinc, Abstinence             |
| 12 | 84  | M   | Cryptogenic                        | Spironolactone, Zinc, Synthetic disaccharides                             |
| 13 | 67  | M   | Alcoholic                          | Spironolactone, Zinc, Abstinence                                          |
| 14 | 52  | M   | Alcoholic                          | Steroid, BCAA                                                             |
| 15 | 61  | M   | HCV                                | Synthetic disaccharides, PSE performing                                   |
| 16 | 63  | M   | HCV+ Alcoholic                     | BCAA, Carnitine, Abstinence                                               |
| 17 | 27  | F   | Alcoholic                          | Zinc, Abstinence                                                          |
| 18 | 69  | M   | HCV+ Alcoholic                     | Abstinence                                                                |
| 19 | 69  | M   | Alcoholic                          | Abstinence                                                                |
| 20 | 65  | M   | Alcoholic                          | Abstinence                                                                |
| 21 | 62  | M   | Alcoholic                          | Abstinence                                                                |
| 22 | 70  | M   | Alcoholic<br>(abstinence >5 years) | None                                                                      |
| 23 | 74  | M   | HCV                                | None                                                                      |
| 24 | 62  | M   | HCV                                | None                                                                      |
| 25 | 62  | F   | NASH                               | None                                                                      |
| 26 | 74  | F   | Cryptogenic                        | None                                                                      |
| 27 | 76  | F   | NASH                               | None                                                                      |

AIH, autoimmune hepatitis; BCAA, branched chain amino acid; F, female; HBV, hepatitis B virus; HCV, hepatitis C virus; M, male; NASH, nonalcoholic steatohepatitis; PBC, primary biliary cholangitis; PSE, partial splenic embolization; RFX, rifaximin

**Supplementary Table S2.** Relationship between hepatic ascites control 3 months after RFX administration and Child–Pugh class ( $n = 97$ ).

|                          | Satisfactory control | Poor control |
|--------------------------|----------------------|--------------|
| Child–Pugh class A and B | 36                   | 24           |
| Child–Pugh class C       | 12                   | 25           |

*n*, number
